# 1 Circuit and cellular mechanisms facilitate the 2 transformation from dense to sparse coding in 3 the insect olfactory system

4 *Rinaldo Betkiewicz<sup>1,2,3</sup>, Benjamin Lindner<sup>1,3</sup> & Martin P. Nawrot<sup>\*1,2</sup>*

5 1. Bernstein Center for Computational Neuroscience Berlin, Berlin, Germany

6 2. Computational Systems Neuroscience, Institute of Zoology, University of Cologne,  
7 Cologne, Germany

8 3. Department of Physics, Humboldt University Berlin, Berlin, Germany

9 \* E-mail: martin.nawrot@uni-koeln.de

## 10 Abstract

11 Transformations between sensory representations are shaped by neural mechanisms at the cellular  
12 and the circuit level. In the insect olfactory system encoding of odour information undergoes a  
13 transition from a dense spatio-temporal population code in the antennal lobe to a sparse code in  
14 the mushroom body. However, the exact mechanisms shaping odour representations and their role  
15 in sensory processing are incompletely identified. Here, we investigate the transformation from  
16 dense to sparse odour representations in a spiking model of the insect olfactory system, focusing  
17 on two ubiquitous neural mechanisms: spike-frequency adaptation at the cellular level and lateral  
18 inhibition at the circuit level. We find that cellular adaptation is essential for sparse representations  
19 in time (temporal sparseness), while lateral inhibition regulates sparseness in the neuronal space  
20 (population sparseness). The interplay of both mechanisms shapes dynamical odour representations,  
21 which are optimised for discrimination of odours during stimulus onset and offset. In addition, we  
22 find that odour identity is stored on a prolonged time scale in the adaptation levels but not in the  
23 spiking activity of the principal cells of the mushroom body, providing a testable hypothesis for the  
24 location of the so-called odour trace.

25 *Keywords: sensory processing, odour trace, efficient coding, lateral inhibition, adaptation,*  
26 *spiking network*

## 27 1 Introduction

28 How nervous systems process sensory information is a key issue in systems neuroscience.  
29 Animals are required to rapidly identify behaviourally relevant stimulus features in a rich  
30 and dynamic sensory environment, and neural computation in sensory pathways is tailored  
31 to this need. Sparse stimulus encoding has been identified as an essential feature of sensory  
32 processing in higher brain areas in both, invertebrate [1, 2, 3, 4, 5] and vertebrate [6, 7, 8, 9]  
33 systems. Sparse representations provide an economical means of neural information coding  
34 [10, 11] where information is represented by only a small fraction of all neurons (popula-  
35 tion sparseness) and each activated neuron generates only few action potentials (temporal  
36 sparseness) for a highly specific stimulus configuration (lifetime sparseness).

37 The nervous systems of insects have limited neuronal resources and thus require particularly  
38 efficient coding strategies. The insect olfactory system is analogue to the vertebrate olfactory  
39 system and has become a popular model system for the emergence of a sparse code. We  
40 use a computational approach to study the transformation from a dense olfactory code in  
41 the sensory periphery to a sparse code in the mushroom body (MB), a central structure  
42 of the insect brain important for multimodal sensory integration and memory formation.  
43 A number of recent studies emphasised the role of sparse coding in the MB. In locusts,  
44 sparse responses were shown to convey temporal stimulus information [12]. In *Drosophila*,  
45 sparse coding was found to reduce overlap between odour representations and facilitate their  
46 discrimination [13]. Consequently, sparse coding is an essential feature of plasticity models  
47 for olfactory learning in insects [14, 15, 16, 17, 18] and theoretical work has emphasised the  
48 analogy of the transformation from a dense code in projection neurons (PNs) to a sparse  
49 code in Kenyon cells (KCs) with dimensionality expansion in machine learning methods  
50 [14, 19, 20].

51 Central to our modelling approach are two fundamental mechanisms of neural computation  
52 that are ubiquitous in the nervous systems of invertebrates and vertebrates. Spike-frequency  
53 adaptation (SFA) is a cellular mechanism that has been suggested to support efficient and  
54 sparse coding and to reduce variability of sensory representation [21, 22, 23]. Lateral in-  
55 hibition is a basic circuit design principle that exists in different sensory systems, mediates  
56 contrast enhancement and facilitates stimulus discrimination [24, 25, 26, 27]. Both mech-  
57 anisms are evident in the insect olfactory system. Responses of olfactory receptor neurons  
58 (ORNs), local interneurons (LNs) and PNs in the antennal lobe (AL) show stimulus ad-  
59 aptation [28, 29] and strong adaptation currents have been identified in KCs [30]. Lateral  
60 inhibition in the AL is mediated by inhibitory LNs [31]. It is crucial for establishing the

population code at the level of PNs [29, 32], for gain control [33, 34], for decorrelation of odour representations [35], and for mixture interactions [29, 36, 37].

Taken together, we find that lateral inhibition and spike-frequency adaptation account for the transformation from a dense to sparse coding, decorrelate odour representations, and facilitate precise temporal responses on short and long time scales.

## 2 Results

### Spiking Network Model of the Olfactory Pathway with Lateral Inhibition and Spike Frequency Adaptation

We designed a spiking network model that reduces the complexity of the insect olfactory processing pathway to a simplified three-layer network (Fig. 1A) that expresses the structural commonality across different insect species: an input layer of olfactory receptor neurons (ORNs), subdivided into different receptor types, the AL, a first order olfactory processing centre, and the MB. Furthermore, the model combines two essential computational elements: (i) lateral inhibition in the AL, and (ii) spike-frequency adaptation in the AL and the MB.

The processing between the layers is based on excitatory feed-forward connections. Converging receptor input from all ORNs of one type is received by spatially confined subunits of the AL called glomeruli. In our model, glomeruli are represented by a single PN and a single inhibitory local interneuron (LN). In the MB, each KC receives on average 12 PN inputs [2], based on a random connectivity between the AL and the MB [38]. All neurons in the AL and the MB were modelled as leaky integrate-and-fire neurons with spike-triggered adaptation. Based on evidence from theoretical [39] and experimental studies [40], adaptation channels cause slow fluctuations. We accounted for this fact by simulating channel noise in the slow adaptation currents (cf. Methods).

We simulated ORN responses to different odour stimuli. ORN responses were modelled in the form of Poisson spike trains with firing rates dependent on the receptor type and the presented stimulus. The relationship is set by a receptor response profile (Fig. 1B left) which determines ORN firing rates for all receptor types to a given stimulus. Responses to different stimuli are generated by shifting the response profile along the receptor space (Fig. 2). The offset between any two stimuli reflects their dissimilarity - similar stimuli activate overlapping sets of olfactory receptors, whereas dissimilar stimuli activate largely disjoint sets of receptors. Stimuli were presented for one second, reflected by a step-like increase of ORN firing rate.

In the absence of stimuli, ORNs fired with a rate of 20 Hz reflecting their spontaneous activation [28]. Both LNs and PNs receive direct ORN input. We tuned synaptic weights of the model to match physiologically observed firing rates of PNs and LNs, which are both about 8 Hz [1, 41, 42] (for details see Methods). Lateral inhibition and spike-frequency adaptation, the neural mechanisms under investigation, both provide an inhibitory contribution to a neuron's total input. In our model, spike-frequency adaptation is a cellular mechanism mediated by a slow, spike-triggered, hyperpolarizing current in LNs, PNs and KCs, whereas a global lateral inhibition in the AL is mediated by LNs with fast synapses that receive input from a single ORN type and inhibit all PNs in a uniform fashion.

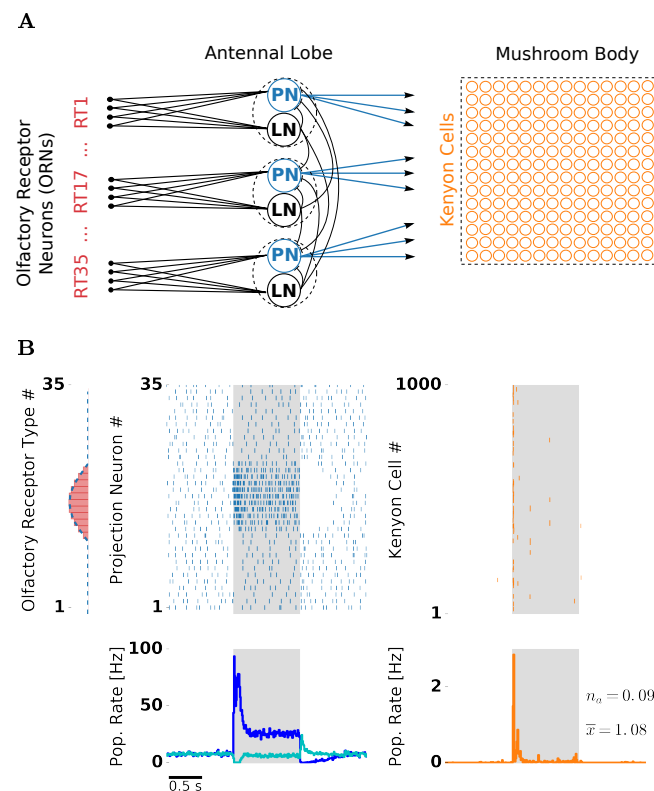

**Fig. 1 – Structure and odour response of the spiking network model.** (A) Network structure resembles the insect olfactory pathway with three main processing stages. PNs (blue) and LNs receive convergent ORN input (red). Each LN provides unspecific lateral inhibition to all PNs. KCs (orange) receive on average 12 inputs from randomly chosen PNs. (B) Receptor response profile (red bars; AL input) depicts the evoked firing rate for each ORN type. Evoked PN spike counts (dashed blue line; AL output) follow the ORN activation pattern. Raster plots depict single trial responses of PNs (blue) and KCs (orange). Presentation of an odour during 1000 ms is indicated by the shaded area. Population firing rates were obtained by averaging over 50 trials. PN spikes display a temporal structure that includes evoked transient responses at stimulus on- and offset, and a pronounced inhibitory post-odour response. PN population rate was averaged over PNs showing “on” responses (blue) and “off” responses (cyan). KC spikes were temporally sparse with majority of the spikes occurring at the stimulus onset.

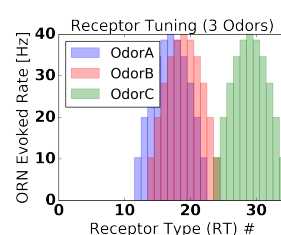

**Fig. 2 – Receptor response profile for two similar odours (red, blue) and a dissimilar odour (green).**

## 102 Dense and Dynamic Odour Representations in the Antennal Lobe

103 Figure 1B illustrates PN and KC responses to an odour. PNs driven by the stimulus showed  
 104 a strong transient response at the stimulus onset, a pronounced adaptation during the  
 105 stimulus, and a period of silence after stimulus offset due to the slow decay of the strong  
 106 adaptation current. This resembles the typical phasic-tonic response patterns of PNs [42, 43].

107 PNs receiving direct input from ORNs activated by the stimulus, showed a strong response  
 108 at the stimulus onset. Interestingly the “on” responses follow a biphasic profile with an  
 109 early and a late component. In addition, PNs with no direct input from stimulated ORNs

110 showed an “off” response at the stimulus offset. Non-driven PNs were suppressed during a  
111 short period after stimulus onset, and showed reduced firing during the tonic response. The  
112 PN population response consisted of complex activations of individual PNs with phases of  
113 excitation and inhibition.

114 Taken together, in the presence of both mechanisms, the PN population response is com-  
115 prised of complex activations of individual PNs with phases of excitation and inhibition.  
116 Hence, in the AL, odours were represented as spatio-temporal spike patterns across the PN  
117 population.

## 118 Sparse Odour Representations in the Mushroom Body

119 At the level of the MB, KCs typically show none or very little spiking during spontaneous  
120 activity and respond to odours with only a few spikes in a temporally sparse manner [1, 3, 4].  
121 In our model, synaptic weights between PNs and KCs were tuned to match a very low  
122 probability of spontaneous firing. Resulting KC responses were temporally sparse. Due to  
123 the negative feedback mediated by strong spike-frequency adaptation, most KC spikes were  
124 confined to stimulus onset.

## 125 Isolating effects of lateral inhibition and adaptation

126 In order to explore effects of lateral inhibition and cellular adaptation on stimulus repres-  
127 entations, we simulated odour responses in conditions in which we deactivated one or both  
128 mechanisms. Lateral inhibition was deactivated by setting the inhibitory synaptic weight  
129 between LNs and PNs to zero and simultaneously reducing the value of the excitatory syn-  
130 aptic weight between ORNs and PNs, such that the spontaneous firing rate of 8 Hz was  
131 kept. Adaptation was deactivated by replacing the dynamic adaptation current by a con-  
132 stant current with an amplitude which approximately maintained the spontaneous firing  
133 rate.

134 Figure 3 illustrates the effects of lateral inhibition and adaptation on odour responses in  
135 the PN population. In all conditions, PNs fired spontaneously before stimulation due to  
136 spontaneous ORN activation. PNs driven by stimulation receive input from ORNs that were  
137 activated by the presented odour. In the absence of adaptation and lateral inhibition (Fig. 3  
138 (i)) the stimulus response followed the step-like stimulation and showed no further temporal  
139 structure. In the presence of lateral inhibition (Fig. 3 (ii)), PNs not driven by the stimulus  
140 were strongly suppressed. In the presence of both mechanisms (Fig. 3 (iv), identical with  
141 the results of Fig. 1B) we observed the characteristic phasic-tonic response. Moreover, the  
142 amplitude of the transient response was diminished, and, interestingly, followed a biphasic  
143 profile with an early and a late component.

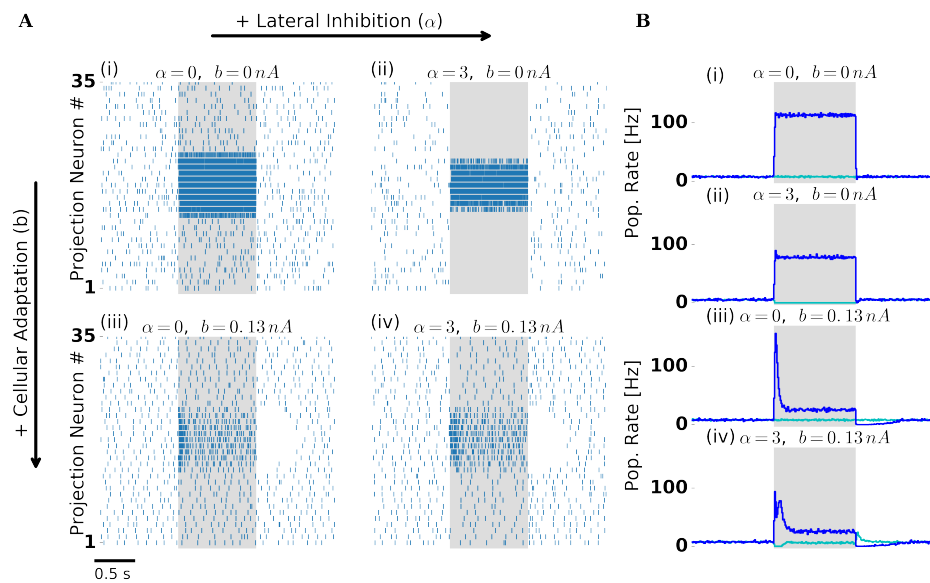

**Fig. 3 – Lateral inhibition and cellular adaptation shape PN odour response dynamics.** (A) Single trial PN spiking responses simulated with (right column) and without (left column) lateral inhibition, and with (bottom row) and without (top row) adaptation. Presentation of a single odour during 1000 ms is indicated by the shaded area. With adaptation PNs display a temporal structure that includes a transient and a tonic response, and a pronounced inhibitory post-odour response. (B) Trial averaged firing rate: PNs driven by stimulation (blue) and remaining PNs (cyan). Panels (i)-(iv) indicate presence and absence of lateral inhibition and adaptation as in (A). In the presence of lateral inhibition firing rates during stimulation are reduced. In the presence of lateral inhibition and adaptation (iv) PNs show either transient “on” responses (blue) or “off” responses (cyan).

144 In our model, the interaction of lateral inhibition and the intrinsic adaptation currents in  
 145 LNs and PNs accounts for biphasic PN responses. Because lateral inhibition is strongest at  
 146 stimulus onset, the most of the phasic PN response was delayed (late component) whereas  
 147 the immediate PN response (early component) was not affected. Comparable evidence for  
 148 the interplay of cellular and network mechanisms behind biphasic PN responses was found  
 149 in the pheromone system of the moth [44].

150 To isolate the contributions of adaptation and lateral inhibition (present at the AL level)  
 151 to the odour responses at the MB level, we again test the four conditions by deactivating  
 152 one or both mechanisms. In all four conditions, KCs were almost silent and spiked only  
 153 sporadically during spontaneous activity, whereas amplitude and temporal profile of their  
 154 odour response differed across conditions (Fig. 4).

155 In the presence of adaptation we observed temporally sparse responses (Fig. 4 (iii)-(iv)).  
 156 KCs typically responded with only 1-3 spikes (mean spikes per responding KC were slightly  
 157 above one, compare  $\bar{x}$  in Fig. 4B (iii),(iv)). Due to the negative feedback mediated by strong  
 158 spike-frequency adaptation, most KC spikes were confined to stimulus onset.

159 In the absence of adaptation and regardless of the presence (Fig. 4 (i)) or absence (Fig. 4  
 160 (ii)) of lateral inhibition, responding KCs fired throughout stimulation, because they received  
 161 persistently strong input from PNs. Such persistent KC responses are in disagreement with  
 162 experimental observations [1, 3, 4].

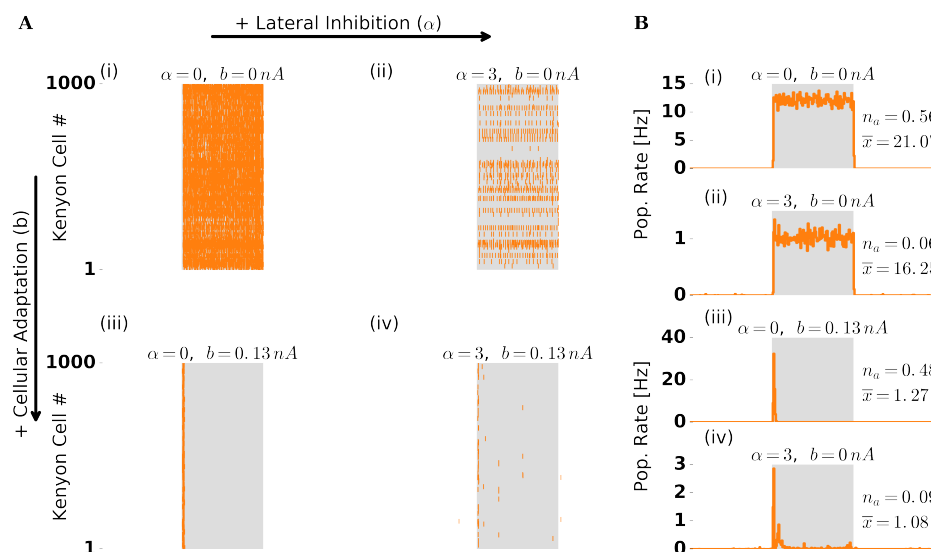

**Fig. 4 – KC odour response dynamics of the population.** Figure layout follows Figure 3. (A) Single trial population spike raster responses. (B) Trial averaged KC population firing rate. Numbers to the right indicate the fraction of activated KCs ( $n_a$ ) and the mean number of spikes per activated KC during stimulation ( $\bar{x}$ ). Without adaptation (i,ii) KCs spike throughout stimulation because PN drive is strong and persistent. The fraction of activated KCs drops in the presence of lateral inhibition (ii,iv). With adaptation (iii,iv) most of KC spikes are confined to the stimulus onset, indicating temporally sparse responses.

We quantified temporal sparseness of KC responses by calculating a measure modified from [45] (cf. Methods). Comparison of temporal sparseness across the four conditions confirms that KC responses were temporally sparse only in the presence of adaptation whereas lateral inhibition had no effect on temporal sparseness (Fig. 5A).

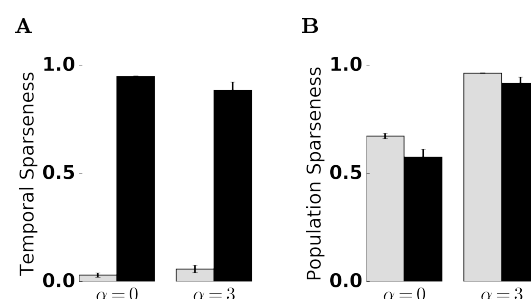

**Fig. 5 – Quantification of temporal and population sparseness in the KC population.** Sparseness was measured in the absence ( $\alpha=0$ ) and presence ( $\alpha=3$ ) of lateral inhibition, averaged over 50 trials. Error bars indicate standard deviation. A value of one corresponds to maximally sparse responses. Gray bars represent a control condition in the absence of spike-frequency adaptation ( $b=0$ ). (A) Adaptation promotes temporal sparseness. (B) Lateral inhibition in the AL promotes KC population sparseness.

## 167 Lateral Inhibition Supports Population Sparseness in the MB

We observed that the fraction of responding KCs was considerably lower in the presence of lateral inhibition (compare  $n_a$  across panels in Fig. 4B). We recall that lateral inhibition in our model is acting on PNs. A reduced PN population rate caused by lateral inhibition (compare Fig. 3 (ii),(iv)) is reflected in a lower net input to KCs. How does this affect KC responses on a population level?

We visualised MB odour representations with activation patterns obtained by arranging evoked KC spike counts on a 30x30 grid in arbitrary order (Fig. 6A). In the absence of

lateral inhibition (Figure 6A top), a majority of the KC population was activated by both tested odours, due to strong PN input. KCs responded with 1-3 spikes. In the presence of lateral inhibition (Figure 6A bottom), the fraction of activated KCs underwent a substantial drop (KCs activated, trial averaged: 9%, std: 3%), whereas the range of individual KC responses (1-3 spikes) was not affected. These activation patterns demonstrate that the MB odour representations are sparse on a population level, as each odour is represented by the activity of a small fraction of the KC population.

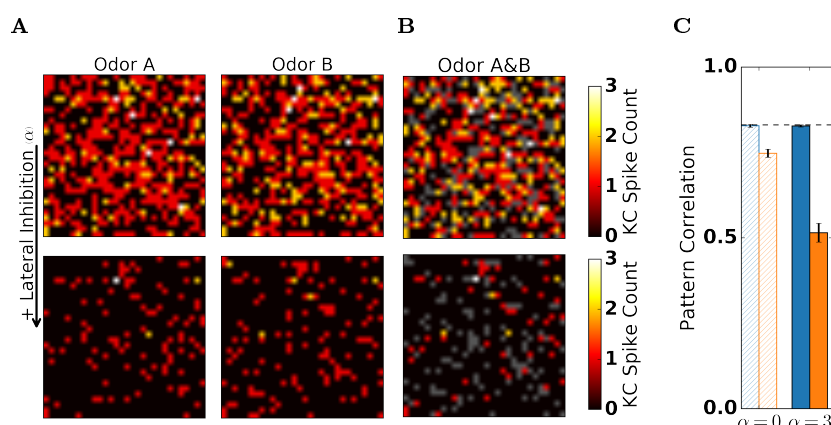

**Fig. 6 – Lateral inhibition in the AL facilitates population sparseness and reduces pattern correlation in the MB.** Spike counts (single trial) of 900 randomly selected KCs in response to two similar odours (“Odour A” and “Odour B”) arranged on a 30x30 grid in the absence (top row) and in the presence (bottom row) of lateral inhibition. Inactive KCs are shown in black. (A) In the absence of lateral inhibition KCs readily responded to both odours, resulting in an activation pattern where most KCs are active. In the presence of lateral inhibition both odours evoked sparse KC activation patterns. (B) Superposition of responses to the two odours. KCs that were activated by both odours are indicated by hot colours (colour bar denotes spike count of the stronger response). KCs that were activated exclusively by one of the two odours are indicated in grey. The fraction of KCs that show overlapping responses is reduced in the presence of lateral inhibition. (C) Pattern correlation of the two odours obtained for PN (blue) and KC (orange) spikes counts, in the absence ( $\alpha = 0$ ) and presence ( $\alpha = 3$ ) and of lateral inhibition. Input overlap indicated by the dashed line. Pattern correlation was retained at the AL and reduced at the MB level. Lateral inhibition in the AL reduced pattern correlation in KCs but not in PNs.

To quantify population sparseness of odour representations in the MB, we again calculated a sparseness measure adopted from [45]. Lateral inhibition increased population sparseness, whereas adaptation increased temporal sparseness (Fig. 5). Both mechanisms act independently. With both mechanisms active, in our model, odour representations at the MB level are characterised by a small fraction of the KC population responding with a small number of spikes. Population and temporal sparseness are in qualitative and quantitative agreement with experimental findings [1, 2, 3, 4].

## Decorrelation of Odour Representations between AL and MB

In our model, lateral inhibition in the AL increased population sparseness of MB odour representations. Given sparse population responses, does the overlap between MB odour representations decrease? We visualised the overlap between odour representations in the MB by overlaying KC activation patterns in response to two similar odours (Fig. 6B). With lateral inhibition, most of the KC responses were unique to odour A or odour B (shown in grey in Fig. 6B) and only relatively few KCs were activated by both odours. In contrast, with lateral inhibition deactivated (Fig. 6B top), the ratio of KCs with unique responses (grey) to the total number of activated cells (all colours) was low, indicating highly overlapping responses.

We measured overlap between odour representations evoked by two similar odours, in the PN and the KC population. To this end, we calculated Pearson’s correlation coefficient between



spike counts evoked by both odours, across the corresponding population (cf. Methods). Interestingly, PNs retained to overlap of the input, independent of lateral inhibition. In contrast, KC representations showed a reduced overlap that decreased even further in the presence of lateral inhibition (Fig. 6C).

**Pattern decorrelation and strength of lateral inhibition** We tested how scaling of the lateral inhibition strength affected the pattern overlap in PN and KC odour representations. To this end, we varied the strength of lateral inhibition in the AL by increasing the strength of inhibitory synapses and adjusting feed-forward weights (see Methods). In addition, we calculated pattern correlations in the absence of adaptation. As before, pattern correlation was calculated for two similar odours that activated an overlapping set of receptors. In the absence of adaptation, lateral inhibition robustly decorrelated odour representations in both populations (Fig. 7C). In the presence of adaptation, increasing lateral inhibition had different effects on the PN and KC population (Fig. 7B). In PNs the correlation of the input was retained for all tested values of lateral inhibition. In KCs pattern correlation first decreased for weak to moderate lateral inhibition strength but then increased for strong lateral inhibition. For an intermediate strength of the inhibitory weights the pattern correlation between KC responses to similar odours attained a minimal value. In general, overlap reduction between KC representations is characteristic for the insect MB [46]. Furthermore low overlap between KC representations has been found to facilitate discrimination of odours [47]. We therefore choose the intermediate strength of the inhibitory weights ( $\alpha = 3$ ) as a reference point in our model.

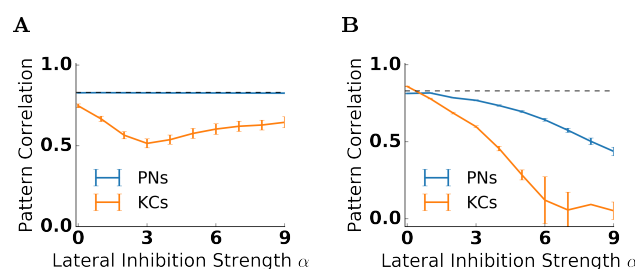

**Fig. 7 – Pattern correlation in the antennal lobe and the mushroom body for different strengths of lateral inhibition  $\alpha$ .** The correlation coefficient between the response patterns to two similar odours was calculated and averaged over 50 trials for PNs (blue) and KCs (green). Error bars indicate standard deviation. Pattern correlation of the input is indicated by the dashed line. Input correlation is high because similar odours activate largely overlapping set of receptors. (A) In the presence of adaptation ( $b = 0.132 \text{ nA}$ ), pattern correlation in PNs (blue) stays close to the input correlation for all values of lateral inhibition strength. In KCs (green) the correlation decreases for small values of lateral inhibition strength, and increases for large values of lateral inhibition strength. Pattern correlation in KCs is minimal for  $\alpha = 3$ . (B) In the absence of adaptation ( $b = 0 \text{ nA}$ ), pattern correlation decreases with the lateral inhibition strength both in PNs and KCs. The decrease is stronger in KCs.

## Odour Encoding on Short and Long Time Scales

Next, we tested if in our model the information about stimulus identity is contained in AL and MB odour representations, by performing a decoding analysis in subsequent time bins of 50ms (cf. Methods). In PNs decoding accuracy peaked during stimulus on- and offset (Fig. 8A). Both peaks coincide with a state of transient network activity caused by the odour on- or offset. The “on” and the “off” responsive PNs establish odour representation optimised for discrimination. After the stimulus onset, decoding accuracy dropped but remained on a plateau well above chance level. Remarkably, after stimulus offset, odour identity could be decoded for an extended time period (several hundreds of ms) albeit with a reduced accuracy. Such odour after effects have been demonstrated previously in experiments [48, 43](cf. Discussion).

In KCs decoding accuracy was above chance level only in the first 2-3 time bins (about 100 ms) after stimulus onset (Fig. 8B). In all other time bins decoding accuracy remained

at chance level. Notably, in our model we found that some KCs showed “off” responses (not shown). These KC “off” spikes are driven by the PN “off” response and occur very rarely because the PN “off” response is much weaker compared to the “on” response. Because the spiking activity in the KC population is temporally sparse, the continuous information at the AL output is lost in the MB spike count representation. This raises the question whether and if so how the information throughout the stimulus could be preserved in the MB. The intrinsic time scale of the adaptation currents might potentially support prolonged odour representations (Fig 8C). We therefore repeated the decoding analysis on the adaptation currents measured in KCs (Fig. 8D). Indeed, the stimulus identity could reliably be decoded based on the intensity of the adaptation currents in subsequent time bins of 50ms. Decoding accuracy peaked after stimulus onset and then slowly decreased. Remarkably, because KCs show very little spontaneous activity, the decay of the classification performance in the absence of stimulation, is caused by slow adaptation current fluctuations due to channel noise.

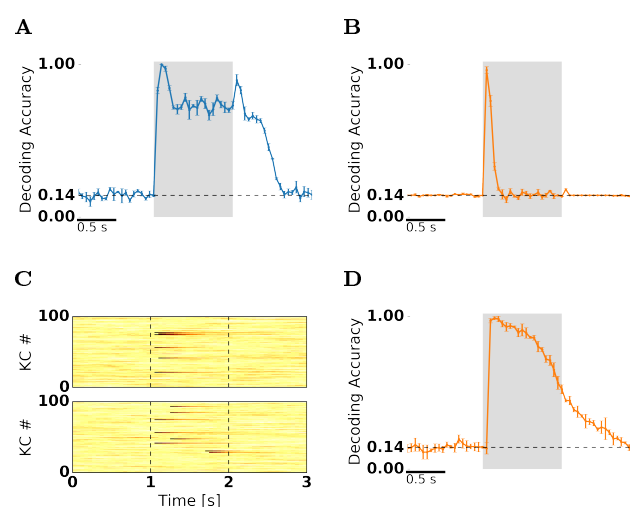

**Fig. 8 – Decoding of odour identity indicates a prolonged and reliable odour information in KC adaptation currents.** (A,B,D) Decoding accuracy was calculated for non-overlapping 50 ms time bins, based on a set of seven stimuli (chance level  $\approx 0.14$ ) presented for one second (shaded area). Blue shading indicates standard deviation obtained from a cross-validation procedure (see Methods). (A) Decoding of odour identity from PN spike counts. Decoding accuracy peaks at odour on- and offset, and remains high after stimulation. (B) Decoding of odour identity from KC spike counts. Decoding accuracy is above chance only in the first three bins following stimulus onset. (C) Adaptation current amplitudes (single trial, hot colours in arbitrary units) of 100 selected KCs in response to “odour A” (top) and “odour B” (bottom). (D) Decoding of odour identity from KC adaptation currents. Decoding accuracy peaks 150 ms after odour onset, then drops during stimulation but remains high and is sustained after odour offset.

### 3 Discussion

We investigated the transformation between dense AL and sparse MB odour representations in a spiking network model of the insect olfactory system. Our model demonstrates lateral inhibition and spike-frequency adaptation as sufficient mechanisms underlying dynamic and combinatorial responses in the AL that are transformed into sparse MB representations. To simulate responses to different odours we incorporated simple ORN tuning and glomerular structure in our model. This approach allows us to investigate how different odours are represented in the AL and MB population activity and assess information contained in respective odour representation. We inspected overlap between odour representations in both populations. Sparse coding reduces overlap between representation, as has been predicted on theoretical grounds [49, 50, 51] and shown for MB odour representations [2, 4, 13]. Similarly, our model shows pattern decorrelation in the MB but not in the AL.

## Post-odor Responses in PNs.

In our model, we found “on” and “off” responsive . At the stimulus offset, the “off” responsive PNs transiently increase, whereas the “on” responsive PNs transiently decrease their firing rate (cf. Fig. 3). “On” responsive PNs remain adapted beyond stimulus offset; their excitability is reduced until the slow adaptation current decays. In contrast, in “off” responsive PNs increased inhibition during stimulation leads to below-baseline adaptation levels at the stimulus offset. Effectively, the odour evoked and the post-odor PN activation patterns are reversed: the post-odor pattern is reversed compared to the activation pattern during stimulation. This result matches well the experimental observations in honeybee [48, 52, 43] and *Drosophila* [53] PNs. Those results show highly correlated response patterns during stimulation, and stable post-odour response patterns. Similar to our result, the post-odour response patterns are anti-correlated with the actual odour response patterns.

## Differential Mechanism Underlying Temporal and Population Sparseness in KCs

Sparse responses in the MB have been shown to rely on various properties of neural circuits such as connectivity, synaptic properties, as well as intrinsic properties of KCs. Presumably sparse KC responses are achieved by an interplay of different mechanisms, i.e. KCs’ high thresholds together with active subthreshold properties to detect coincident input from convergent PN synapses [1, 54, 4], or pre- and post-synaptic inhibition [2, 55, 56, 57, 13]. On a cellular level, strong adaptation currents in KCs, which are suitable for generation of sparse responses, have been found in the honeybee [58] and cockroach [30]. The facilitating role of cellular adaptation in temporal sparseness has also been confirmed in the modelling framework by [23]. Our model results indicate that adaptation is indeed sufficient for temporally sparse responses in the MB. KC responses were confined to the stimulus onset due to the negative feedback mediated by spike-frequency adaptation. In addition, we found that lateral inhibition in the AL promotes population sparseness, because it redistributes PN output activity such that only a small fraction of KCs is activated for each odour. In our model, the mechanisms acting on population- and temporal sparseness are independent. We thus clearly differentiate between those two types of sparseness in our analysis.

The KC population sparseness in our model matches qualitatively and quantitatively with experimental estimates from extracellular responses in locust and *Drosophila* [1, 4] and from calcium imaging in *Drosophila* [5]. Our model shows sparse KC responses on a population level in the presence but not in the absence of lateral inhibition. Calcium imaging experiments in the honeybee [59, 23] have shown that deactivating GABA transmission (through pharmacological blocking of different GABA receptor types) disrupts population sparseness in line with our modelling results.

Temporal sparseness of KC responses in our model again compares well to the experimentally recorded responses in *Drosophila*, locust and moth (electrophysiology) [1, 2, 3, 4], and calcium imaging experiments in the honeybee [2]. Our model relies on spike-frequency adaptation for temporally sparse responses. In our model temporal sparseness is not affected by the deactivation of lateral inhibition, a finding supported a previous study [23]. There is further evidence for a GABA-independent mechanism for the temporal shortening of KC responses. Calcium imaging studies in *Drosophila* [57, 13] and in the honeybee [59] showed that the temporal profile of KCs’ fast response dynamics is preserved independent of GABA inhibition.

Several studies have stressed the role of inhibitory circuits at the MB level in generating or regulating sparse responses. These include local inhibition in microcircuits [2], feed-forward inhibition [60, 61] and feed-back inhibition [2, 56, 12, 57, 62], regarding population sparseness, temporal sparseness, or both. In fact, the existence of inhibitory feedback neurons in the MB has been demonstrated experimentally in different insect species (cockroach [63], *Drosophila* [64], honeybee [65], locust [56]), whereas evidence for feed-forward inhibition to

the MB so far has not been found [12]. We show with our model that global inhibition at the level of the MB is not strictly necessary to obtain sparse responses. However, those different mechanism of sparseness are not exclusive and may be at work at the same time.

In addition, global inhibition in the MB has been proposed to provide gain control via feed-forward [61] or feedback [56] connections. The authors of these studies found gain control was necessary to maintain population sparseness in response to odours of different concentrations. In our approach, the input to our model is normalised by construction, hence we did not address gain control at the MB. Decorrelation of Odour Representations between AL and MB

Decorrelation of stimulus representations has been postulated to be one fundamental principle underlying sensory processing [66, 67]. In particular, in the olfactory system odour representations are transformed to decorrelate activity patterns evoked by similar odours [68, 69, 70] making them more distinct. Transformations decreasing the overlap between representations are termed pattern decorrelation. Less overlapping representations increase memory capacity [45] and make discrimination of odours easier [47]. In our model, we found that AL odour representations preserved the similarity of the input, whereas at the level of the MB, representations of similar odours were decorrelated.

We have examined the effects of lateral inhibition and adaptation on pattern correlations between representations of similar odours. We have found that, in the AL decorrelation of activity patterns occurred only in the absence of adaptation. Moreover, the amount of decorrelation depended on lateral inhibition strength. In computational studies lateral inhibition was previously shown to decorrelate odour representations [61, 19]. In a *Drosophila* study using extracellular recording, lateral connection in the AL were found not to affect correlations between glomerular channels [71], but there is also evidence for decorrelation of AL representations [72]. In our model, pattern correlation between representations of similar odours is preserved at the level of the AL but not in the MB.

### Odour representation in adaptation currents

Early investigations of dynamical odour representations have shown that odour identity can be reliably decoded from PN spike counts in 50 ms time bins [33, 73]. We used this approach to show that odour representations were specific and reliable in our model, including both AL and MB odour representations. We found that at the AL level, odour representation were optimised for discrimination during odour on- and offset. In line with previous findings in PNs [73, 29] the peak accuracy coincided with transient network activity. Unlike in the AL, at the MB level, stimulus identity could be decoded from KC spike counts only during a short time window after stimulus onset (up to about 150 ms, see Fig. 8B). This is a consequence of the temporally sparse responses of KCs. However, we found that KC adaptation currents retain a representation of stimulus identity, resembling a prolonged odour trace.

In our model, an odour trace present in adaptation levels extends well beyond the brief spiking responses. Adaptation currents constitute an internal dynamical state of the olfactory network that is not directly accessible to downstream neurons - a “hidden” state [74]) However, adaptation levels influence the responses to (subsequent) stimuli [23] and may also affect downstream processing through an indirect pathway. An odour trace in the adaptation levels could be mediated via a calcium signal. Supporting this hypothesis, calcium and calcium-dependent currents likely to mediate strong cellular adaptation have been found in KCs in the cockroach [30].

Nevertheless, our results suggest that odour representations are not exclusively found in the spiking activity. Odour representations in the calcium signal are likely to mediate and regulate the formation of associative memories through biochemical mechanisms on the cellular level. We predict that, long-lasting levels of calcium in the KC population contain information about the odour an animal is perceiving. Therefore, as in our model, classification of calcium levels recorded in the MB should reveal odour identity on long

temporal scales. This might underlie the eligibility of a stimulus in classical conditioning and trace conditioning experiments.

## 4 Methods

### 4.1 Spiking Network Model

A spiking network model with 3 layers (ORN, AL and MB, see Fig. 1AB) was simulated using Brian 1.4 [75]. The model includes 35 ORN types, 35 PNs and LNs, and 1000 KCs. A LN-PN pair constitutes 35 glomeruli. Across insect species, the number of glomeruli varies from a few tens to several hundred (cf. Supplementary Materials), we based our model on the lower end of this range. The ratio between the number of PNs and KCs is roughly based on the data available in *Drosophila* [4].

The connections between the 3 network layers (ORNs, AL, MB) are feed-forward and excitatory. Within the AL, LNs provide lateral inhibition to PNs. ORNs provide input to PNs and LNs. All ORNs of the same receptor type target the same, single glomerulus. Every LN has inhibitory connections with all PNs, mediating unspecific lateral inhibition within the AL. Every KC receives 12 PN inputs on average [2]. PN-KC connections were drawn from a random distribution. Synaptic weights between all neurons are given in Table 1 for four different simulation conditions (see below). The synaptic weight  $w_{OL}$  was adjusted to achieve a spontaneous LN firing rate of  $\sim 8$  Hz that is well within the experimentally observed range [1, 41].

|          | (i)  | (ii)    | (iii) | (iv)    |
|----------|------|---------|-------|---------|
| $w_{OL}$ | 1 nS | 1 nS    | 1 nS  | 1 nS    |
| $w_{OP}$ | 1 nS | 1.12 nS | 1 nS  | 1.12 nS |
| $w_{LP}$ | 0 nS | 3 nS    | 0 nS  | 3 nS    |
| $w_{PK}$ | 5 nS | 5 nS    | 5 nS  | 5 nS    |

**Tab. 1** – Synaptic weights for  $w_{OL}$  (ORN-LN),  $w_{OP}$  (ORN-PN),  $w_{LP}$  (LN-PN) and  $w_{PK}$  (PN-KC) connections in different simulation conditions ((i)-(iv)).

#### 4.1.1 Neuron Model

PNs, LNs, and KCs were modelled as leaky integrate-and-fire neurons with conductance-based synapses and a spike-triggered adaptation [76] current  $I^A$ . The membrane potential of the  $i$ -th neuron from the PN, LN, and KC populations obeys:

$$c_m \frac{d}{dt} v_i^P = g_L (E_L - v_i^P) + g_i^{OP} (E_E - v_i^P) - g^{LP} (E_I - v_i^P) - I_i^A, \quad (1)$$

$$c_m \frac{d}{dt} v_i^L = g_L (E_L - v_i^L) + g_i^{OL} (E_E - v_i^L) - I_i^A, \quad (2)$$

$$c_m \frac{d}{dt} v_i^K = g_L (E_L - v_i^K) + g_i^{PK} (E_E - v_i^K) - I_i^A. \quad (3)$$

Membrane potentials follow a fire-and-reset rule. The fire-and-reset rule defines the spike trains of PNs, LNs and KCs denoted by  $x_i^B = \sum_k \delta(t - t_{ik}^B)$  for the  $i$ -th neuron of type B. The spike trains of the ORN neurons are generated by a Poisson process with spike times  $t_{ijk}^O$  for the  $j$ -th receptor neuron of the  $k$ -th receptor type:

$$x_i^O(t) = \sum_j \sum_k^{N_O/N_{glu} N_{glu}} \delta(t - t_{ijk}^O). \quad (4)$$

390 Synaptic conductances  $g_i$  obey:

$$\tau_E \frac{d}{dt} g_i^{OP} = -g_i^{OP} + \tau_E w_{OP} x_i^O(t), \quad (5)$$

$$\tau_E \frac{d}{dt} g_i^{OL} = -g_i^{OL} + \tau_E w_{OL} x_i^O(t), \quad (6)$$

$$\tau_I \frac{d}{dt} g_i^{LP} = -g_i^{LP} + \tau_I w_{LP} \sum_j^{N_{Glu}} x_j^L(t), \quad (7)$$

$$\tau_E \frac{d}{dt} g_i^{PK} = -g_i^{PK} + \tau_E \sum_j^{N_{Glu}} W_{ij} x_j^P(t). \quad (8)$$

391 Adaptation currents  $I_i^A$  obey:

$$\tau_A \frac{d}{dt} I_i^A = -I_i^A + \tau_A \Delta I^A x_i(t) + \sqrt{2\tau_A \sigma_I^2} \xi(t). \quad (9)$$

392 where  $\tau_A$  is the time constant and  $\Delta I^A$  the spike-triggered increase of the adaptation current.  
 393 The last term reflects the diffusion approximation of channel noise [39], where  $\xi(t)$  represents  
 394 Gaussian, white noise. The variance of the adaptation currents  $I_i^A$  is given by  $\sigma_I^2$ .

#### 395 4.1.2 Receptor Input

396 ORNs were modelled as Poisson spike generators, with evoked firing determined by a receptor  
 397 response profile and a spontaneous baseline. In the absence of stimulus the spontaneous firing  
 398 rate of all ORNs is set to  $r_O^{BG} = 20$  Hz. In the presence of a stimulus the ORN firing rate  
 399 is given by the summation of the spontaneous rate and an activation  $\Delta r_O$ :

$$r_O(t) = \begin{cases} r_O^{BG} + \Delta r_O & \text{for } t_{start} < t < t_{stop} \\ r_O^{BG} & \text{else} \end{cases}. \quad (10)$$

400 The intensity (amplitude) of ORN activation  $\Delta r_O$  is given by the receptor response profile  
 401 that depends on receptor type and stimulus identity. Receptor activation follows a sine  
 402 profile over half a period ( $0 \dots \pi$ ):

$$\Delta r_O = 40 \text{ Hz} \begin{cases} \sin(x\pi) & \text{for } 0 < x < 1 \\ 0 & \text{else} \end{cases},$$

403

$$x = \frac{(k_{RT} - k_S) \bmod N_{RT}}{N_a + 1},$$

404 where  $k_S$  is the stimulus index,  $k_{RT}$  the receptor type index,  $N_{RT} = 35$  is the total number  
 405 of receptor types and  $N_a = 11$  is the number of receptor types activated by a stimulus.  
 406 Given these parameters 35 different odour responses can be simulated ( $k_S = 0 \dots 34$ ). This  
 407 profile ensures that odour responses are evenly distributed across receptor types, while the  
 408 choice of the sine shape was arbitrary. If the difference between the index of two stimuli  
 409  $\Delta k_s$  is small, those two stimuli are called similar, because they elicit largely overlapping  
 410 responses. For  $\Delta k_s > 12$  the responses do not overlap representing dissimilar stimuli.

#### 411 4.1.3 Simulations

412 Responses to a set of 7 stimuli, 50 trials each, and 3000 ms trial duration were simulated.  
 413 Stimuli had a duration of 1000 ms and were presented at  $t=1000$  ms. To ensure steady state  
 414 initial conditions simulations were initialised for 2000 ms without recording the activity.

Four different scenarios were simulated: without lateral inhibition and cellular adaptation (i), with lateral inhibition (ii), with cellular adaptation (iii) and with lateral inhibition and cellular adaptation (iv). We quantified the strength of lateral inhibition with a multiplicative factor  $\alpha$ , that set by the synaptic weight  $w_{LP}$  in units of  $w_{OL}$ . In scenarios without cellular adaptation ((i), (ii)) the dynamic adaptation current was replaced by a static current  $I_i^A \equiv I_0 = 0.38$  nA in the PN and LN populations, whereas in the KC population it was set to zero  $I_i^A \equiv 0$  nA. In scenarios without lateral inhibition ((i), (iii)) the inhibitory weights  $w_{LP}$  were set to zero by setting  $\alpha = 0$ . In all scenarios the spontaneous firing rate of PNs was set to  $\sim 8$  Hz [1, 41, 42], by adjusting the synaptic weights between the ORNs and the PNs  $w_{OP}$ .

The spike count of the  $i$ -th neuron, in the  $k$ -th time bin with size  $\Delta t$  is given by:

$$n_{i,k} = \int_{(k-1)\Delta t}^{k\Delta t} dt x_i(t). \quad (11)$$

Population firing rates were obtained from the spike count in a small time bin ( $\Delta t = 10$  ms)

$$\rho_k = \frac{1}{\Delta t} \langle n_{i,k} \rangle_i,$$

where  $\langle \cdot \rangle_i$  indicates the population average. In addition population firing rates were averaged over 50 trials.

## 4.2 Data Analysis

**Sparseness Measure** Sparseness of evoked KC responses was quantified by the widely used modified Treves–Rolls measure [45, 77]:

$$s = 1 - \frac{\left( \frac{1}{N} \sum_{i=1}^N a_i \right)^2}{\frac{1}{N} \sum_{i=1}^N a_i^2},$$

where  $a_i$  indicates either the distribution of KC spike counts (population sparseness, for  $i$  between 1 and 1000), or binned KC population firing rate (temporal sparseness,  $\Delta t = 50$  ms, for  $i$  between 1 and 20). The sparseness measure takes values between zero and one, high values indicate sparse responses. Both measures were averaged over 50 trials.

**Pattern Overlap** Pattern overlap between two similar odours was calculated using Pearson’s correlation coefficient:

$$\rho_{XY} = \frac{\langle (n_i - \langle n_i \rangle) (m_i - \langle m_i \rangle) \rangle}{\sqrt{\langle (n_i - \langle n_i \rangle)^2 \rangle \langle (m_i - \langle m_i \rangle)^2 \rangle}}, \quad (12)$$

where  $n_i$  and  $m_i$  are the spike count vectors of the  $i$ -th neuron in response to two respective odours ( $\Delta k_S = 2$ ). The averages (indicated by  $\langle \cdot \rangle$ ) are taken over neurons. The correlation coefficient was calculated both for the PN and the KC population, and averaged over 50 trials and 5 network realisations with randomly drawn PN-KC connectivity.

**Lateral Inhibition scaling with parameter  $\alpha$**  In order to test if the decrease of overlap was robust for different strengths of lateral inhibition, the synaptic weight  $w_{LP}$  was scaled with a parameter  $\alpha$ .

$$w_{LP} = \alpha w_0. \quad (13)$$

445 The synaptic weight  $w_{OP}$  was adjusted as follows:

$$w_{OP} = w_0 (1 + \alpha b), \quad (14)$$

446 where  $b$  was estimated from simulations under the condition that for a range of lateral  
447 inhibition strengths ( $\alpha \in [0, 9]$ ) the spontaneous PN firing rate was close to 8 Hz.

448 **Decoding Analysis** Odour identity was recovered from odour representations by Gaussian  
449 naive Bayes classification [78], using the scikit-learn package [79]. Training and testing data  
450 consisted of simulated odour representations for a set of seven stimuli ( $k_S = 0, 2, \dots, 12$ ),  
451 50 trials each. Classification was repeated for every time bin ( $\Delta t = 50$  ms, 60 bins total)  
452 for PN spike counts, KC spike counts, or amplitudes of KC adaptations currents. Data was  
453 divided into a training and testing set using a 3-fold cross-validation procedure. Decoding  
454 accuracy was estimated by the *maximum a posteriori* method and is given by the fraction  
455 of successful classification trials divided by the total number of test trials.

### 4.3 Parameters of the Neuron Model

| Neuron Parameters             |              |                      |
|-------------------------------|--------------|----------------------|
| membrane capacitance          | $c_m$        | 289.5 pF             |
| leak conductance              | $g_L$        | 28.95 nS             |
| leak potential                | $E_L$        | -70 mV               |
| reset potential               | $V_R$        | -70 mV               |
| threshold potential           | $V_T$        | -57 mV               |
| refractory time               | $\tau_{ref}$ | 5 ms                 |
| Synaptic Parameters           |              |                      |
| 457 synaptic weight           | $w_0$        | 1 nS                 |
| excitatory synaptic potential | $E_E$        | 0 mV                 |
| excitatory time constant      | $\tau_E$     | 2 ms                 |
| inhibitory synaptic potential | $E_I$        | -75 mV               |
| inhibitory time constant      | $\tau_I$     | 10 ms                |
| Adaptation Parameters         |              |                      |
| spike triggered current       | $\Delta I^A$ | 0.132 nA             |
| adaptation time constant      | $\tau_A$     | 389 ms               |
| adaptation current variance   | $\sigma_I^2$ | 87.1 pA <sup>2</sup> |

458 **Authors' contributions.** RB and MPN designed the research, RB implemented the model and analysed the data,  
459 RB and MPN discussed results and analysis and drafted the manuscript; BL discussed results and analysis, and  
460 helped drafting the manuscript. All authors commented on the manuscript and gave final approval for publication.

461 **Competing interests.** We declare we have no competing interests.

462 **Funding.** RB received funding by the DFG through the Research Training Group Sensory Computation in Neural  
463 Systems (GRK 1589). MN received funding from them German Federal Ministry of Education and Research  
464 (BMBF) within the Bernstein Focus Neuronal Learning: Insect Inspired Robots (Grant 01GQ0941).

465 **Acknowledgement.** We thank Farzad Farkhooi for the initial network model and conceptual discussions.



# References

- [1] Perez-Orive J, Mazor O, Turner GC, Cassenaer S, Wilson RI, Laurent G, 2002 Oscillations and sparsening of odor representations in the mushroom body. *Science* **297**, 359–65. doi:10.1126/science.1070502
- [2] Szyszka P, Ditzen M, Galkin A, Galizia CG, Menzel R, Ditzen M, Galkin A, Giovanni C, 2005 Sparsening and Temporal Sharpening of Olfactory Representations in the Honeybee Mushroom Bodies. *J. Neurophysiol.* **94**, 3303–3313. doi:10.1152/jn.00397.2005.
- [3] Ito I, Ong RCY, Raman B, Stopfer M, 2008 Sparse odor representation and olfactory learning. *Nat. Neurosci.* **11**, 1177–84. doi:10.1038/nn.2192
- [4] Turner GC, Bazhenov M, Laurent G, 2008 Olfactory Representations by Drosophila Mushroom Body Neurons. *J. Neurophysiol.* **734** –746. doi:10.1152/jn.01283.2007.
- [5] Honegger KS, Campbell Raa, Turner GC, 2011 Cellular-resolution population imaging reveals robust sparse coding in the Drosophila mushroom body. *J. Neurosci.* **31**, 11772–85. doi:10.1523/JNEUROSCI.1099-11.2011
- [6] Hromádka T, DeWeese MR, Zador AM, 2008 Sparse representation of sounds in the unanesthetized auditory cortex. *PLoS Biol.* **6**, e16. doi:10.1371/journal.pbio.0060016
- [7] Vinje WE, Gallant JL, 2000 Sparse coding and decorrelation in primary visual cortex during natural vision. *Science* **287**, 1273–1276. doi:10.1126/science.287.5456.1273
- [8] Wolfe J, Houweling AR, Brecht M, 2010 Sparse and powerful cortical spikes. *Curr. Opin. Neurobiol.* **20**, 306–312. doi:10.1016/j.conb.2010.03.006
- [9] Isaacson JS, 2010 Odor representations in mammalian cortical circuits. *Curr. Opin. Neurobiol.* **20**, 328–331. doi:10.1016/j.conb.2010.02.004
- [10] Laughlin SB, Sejnowski TJ, 2003 Communication in neuronal networks. *Science* **301**, 1870–1874. doi:10.1126/science.1089662
- [11] Faisal AA, Selen LPJ, Wolpert DM, 2008 Noise in the nervous system. *Nat. Rev. Neurosci.* **9**, 292. doi:10.1038/nrn2258
- [12] Gupta N, Stopfer M, 2012 Functional analysis of a higher olfactory center, the lateral horn. *J. Neurosci.* **32**, 8138–48. doi:10.1523/JNEUROSCI.1066-12.2012
- [13] Lin AC, Bygrave AM, de Calignon A, Lee T, Miesenböck G, 2014 Sparse, decorrelated odor coding in the mushroom body enhances learned odor discrimination. *Nat. Neurosci.* **17**, 559–68. doi:10.1038/nn.3660
- [14] Huerta R, Nowotny T, 2009 Fast and robust learning by reinforcement signals: explorations in the insect brain. *Neural Comput.* **21**, 2123–51. doi:10.1162/neco.2009.03-08-733
- [15] Wessnitzer J, Young JM, Armstrong JD, Webb B, 2012 A model of non-elemental olfactory learning in Drosophila. *J. Comput. Neurosci.* **32**, 197–212. doi:10.1007/s10827-011-0348-6
- [16] Ardin P, Peng F, Mangan M, Lagogiannis K, Webb B, 2016 Using an Insect Mushroom Body Circuit to Encode Route Memory in Complex Natural Environments. *PLoS Comput. Biol.* **12**. doi:10.1371/journal.pcbi.1004683
- [17] Peng F, Chittka L, 2016 A Simple Computational Model of the Bee Mushroom Body Can Explain Seemingly Complex Forms of Olfactory Learning and Memory. *Curr. Biol.* **0**, 2597–2604. doi:10.1016/j.cub.2016.10.054
- [18] Müller J, Nawrot M, Menzel R, Landgraf T, 2017 A neural network model for familiarity and context learning during honeybee foraging flights. *Biol. Cybern.* 1–14. doi:10.1007/s00422-017-0732-z
- [19] Schmuker M, Pfeil T, Nawrot MP, 2014 A neuromorphic network for generic multivariate data classification. *PNAS* **111**, 2081–6. doi:10.1073/pnas.1303053111
- [20] Mosqueiro TS, Huerta R, 2014 Computational models to understand decision making and pattern recognition in the insect brain. *Curr. Opin. insect Sci.* **6**, 80–85. doi:10.1016/j.cois.2014.10.005
- [21] Benda J, Herz AVM, 2003 A universal model for spike-frequency adaptation. *Neural Comput.* **15**, 2523–64. doi:10.1162/08997660322385063
- [22] Farkhooi F, Muller E, Nawrot M, 2011 Adaptation reduces variability of the neuronal population code. *Phys. Rev. E* **83**, 1–4. doi:10.1103/PhysRevE.83.050905
- [23] Farkhooi F, Froese A, Muller E, Menzel R, Nawrot MP, 2013 Cellular Adaptation Facilitates Sparse and Reliable Coding in Sensory Pathways. *PLoS Comput. Biol.* **9**, e1003251. doi:10.1371/journal.pcbi.1003251
- [24] Kuffler SW, 1953 Discharge Patterns and Functional Organization of Mammalian Retina. *J. Neurophysiol.* **16**, 37–68
- [25] Hartline HK, Wagner HG, Ratliff F, 1956 Inhibition in the eye of Limulus. *J. Gen. Physiol.* **39**, 651–73. doi:10.1085/jgp.200709918
- [26] Fuchs JL, Brown PB, 1984 Two-point discriminability: Relation to properties of the somatosensory system. *Somatosens. Res.* **2**, 163–169
- [27] Oswald AMM, Schiff ML, Reyes AD, 2006 Synaptic mechanisms underlying auditory processing. *Curr. Opin. Neurobiol.* **16**, 371–376. doi:10.1016/j.conb.2006.06.015

- 522 [28] Nagel KI, Wilson RI, 2011 Biophysical mechanisms underlying olfactory receptor neuron dynamics. *Nat.*  
523 *Neurosci.* **14**, 208–16. doi:10.1038/nn.2725
- 524 [29] Krofczik S, Menzel R, Nawrot MP, 2009 Rapid odor processing in the honeybee antennal lobe network. *Front.*  
525 *Comput. Neurosci.* **2**, 9. doi:10.3389/neuro.10.009.2008
- 526 [30] Demmer H, Kloppenburg P, 2009 Intrinsic membrane properties and inhibitory synaptic input of kenyon cells  
527 as mechanisms for sparse coding? *J. Neurophysiol.* **102**, 1538–50. doi:10.1152/jn.00183.2009
- 528 [31] Wilson RI, 2013 Early olfactory processing in Drosophila: mechanisms and principles. *Annu. Rev. Neurosci.*  
529 **36**, 217–41. doi:10.1146/annurev-neuro-062111-150533
- 530 [32] Wilson RI, Turner GC, Laurent G, 2004 Transformation of olfactory representations in the Drosophila antennal  
531 lobe. *Science* **303**, 366–370. doi:10.1126/science.1090782
- 532 [33] Stopfer M, Jayaraman V, Laurent G, 2003 Intensity versus identity coding in an olfactory system. *Neuron*  
533 **39**, 991–1004. doi:10.1016/j.neuron.2003.08.011
- 534 [34] Olsen SR, Wilson RI, 2008 Lateral presynaptic inhibition mediates gain control in an olfactory circuit. *Nature*  
535 **452**, 956–960. doi:10.1038/nature06864
- 536 [35] Wilson RI, Laurent G, 2005 Role of GABAergic inhibition in shaping odor-evoked spatiotemporal patterns in  
537 the Drosophila antennal lobe. *J. Neurosci.* **25**, 9069–79. doi:10.1523/JNEUROSCI.2070-05.2005
- 538 [36] Deisig N, Giurfa M, Sandoz JC, 2010 Antennal lobe processing increases separability of odor mixture repres-  
539 entations in the honeybee. *J. Neurophysiol.* **103**, 2185–2194. doi:10.1152/jn.00342.2009
- 540 [37] Capurro A, Baroni F, Olsson SB, Kuebler LS, Karout S, Hansson BS, Pearce TC, 2012 Non-linear blend  
541 coding in the moth antennal lobe emerges from random glomerular networks. *Front. Neuroeng.* **5**, 6. doi:  
542 10.3389/fneng.2012.00006
- 543 [38] Caron SJC, Ruta V, Abbott LF, Axel R, 2013 Random convergence of olfactory inputs in the Drosophila  
544 mushroom body. *Nature* **497**, 113–7. doi:10.1038/nature12063
- 545 [39] Schwalger T, Fisch K, Benda J, Lindner B, 2010 How noisy adaptation of neurons shapes interspike interval  
546 histograms and correlations. *PLoS Comput. Biol.* **6**, e1001026. doi:10.1371/journal.pcbi.1001026
- 547 [40] Fisch K, Schwalger T, Lindner B, Herz A, Benda J, 2012 Channel noise from both slow adaptation currents  
548 and fast currents is required to explain spike-response variability in a sensory neuron. *J. Neurosci.* **32**, 17332.  
549 doi:10.1523/JNEUROSCI.6231-11.2012
- 550 [41] Chou YH, Spletter ML, Yaksi E, Leong JCS, Wilson RI, Luo L, 2010 Diversity and wiring variability of  
551 olfactory local interneurons in the Drosophila antennal lobe. *Nat. Neurosci.* **13**, 439–49. doi:10.1038/nn.2489
- 552 [42] Meyer A, Galizia CG, Nawrot MP, 2013 Local interneurons and projection neurons in the antennal lobe from  
553 a spiking point of view. *J. Neurophysiol.* **110**, 2465–74. doi:10.1152/jn.00260.2013
- 554 [43] Nawrot MP, 2012 Dynamics of sensory processing in the dual olfactory pathway of the honeybee. *Apidologie*  
555 doi:10.1007/s13592-012-0131-3
- 556 [44] Belmabrouk H, Nowotny T, Rospars JP, Martinez D, 2011 Interaction of cellular and network mechan-  
557 isms for efficient pheromone coding in moths. *Proc. Natl. Acad. Sci. U. S. A.* **108**, 19790–5. doi:  
558 10.1073/pnas.1112367108
- 559 [45] Treves A, Rolls ET, 1991 What determines the capacity of autoassociative memories in the brain? *Netw.*  
560 *Comput. Neural Syst.* **2**, 371–397. doi:10.1088/0954-898X/2/4/004
- 561 [46] Laurent G, 2002 Olfactory network dynamics and the coding of multidimensional signals. *Nature Rev. Neur-*  
562 *osci.* **3**, 884
- 563 [47] Campbell Raa, Honegger KS, Qin H, Li W, Demir E, Turner GC, 2013 Imaging a population code for odor  
564 identity in the Drosophila mushroom body. *J. Neurosci.* **33**, 10568–81. doi:10.1523/JNEUROSCI.0682-12.2013
- 565 [48] Szyszka P, Demmler C, Oemisch M, Sommer L, Biergans S, Birnbach B, Silbering AF, Galizia CG,  
566 2011 Mind the gap: olfactory trace conditioning in honeybees. *J. Neurosci.* **31**, 7229–39. doi:  
567 10.1523/JNEUROSCI.6668-10.2011
- 568 [49] Marr BYD, 1969 A theory of cerebellar cortex. *J. Physiol.* **202**, 437–470. doi:10.2307/1776957
- 569 [50] Albus JS, 1971 A theory of cerebellar function. *Math. Biosci.* **10**, 25–61. doi:10.1016/0025-5564(71)90051-4
- 570 [51] Kanerva P, 1988 *Sparse Distributed Memory*. MIT Press, Cambridge, MA
- 571 [52] Stierle JS, Galizia CG, Szyszka P, 2013 Millisecond stimulus onset-asynchrony enhances information about  
572 components in an odor mixture. *J. Neurosci.* **33**, 6060–9. doi:10.1523/JNEUROSCI.5838-12.2013
- 573 [53] Galili DS, Lüdke A, Galizia CG, Szyszka P, Tanimoto H, 2011 Olfactory trace conditioning in Drosophila. *J.*  
574 *Neurosci.* **31**, 7240–7248. doi:10.1523/JNEUROSCI.6667-10.2011
- 575 [54] Jortner RA, Farivar SS, Laurent G, 2007 A Simple Connectivity Scheme for Sparse Coding in an Olfactory  
576 System. *J. Neurosci.* **27**, 1659–1669. doi:10.1523/JNEUROSCI.4171-06.2007
- 577 [55] Szyszka P, Galkin A, Menzel R, 2008 Associative and non-associative plasticity in Kenyon cells of the honeybee  
578 mushroom body. *Front. Syst. Neurosci.* **2**, 3. doi:10.3389/neuro.06.003.2008

- 579 [56] Papadopoulos M, Cassenaer S, Nowotny T, Laurent G, 2011 Normalization for sparse encoding of odors by a  
580 wide-field interneuron. *Science* **332**, 721–5. doi:10.1126/science.1201835
- 581 [57] Lei Z, Chen K, Li H, Liu H, Guo A, 2013 The GABA system regulates the sparse coding of odors in the mush-  
582 room bodies of *Drosophila*. *Biochem. Biophys. Res. Commun.* **436**, 35–40. doi:10.1016/j.bbrc.2013.05.036
- 583 [58] Wüstenberg DG, Boytcheva M, Grünewald B, Byrne JH, Menzel R, Baxter Da, 2004 Current- and voltage-  
584 clamp recordings and computer simulations of Kenyon cells in the honeybee. *J. Neurophysiol.* **92**, 2589–603.  
585 doi:10.1152/jn.01259.2003
- 586 [59] Froese A, Szyszka P, Menzel R, 2014 Effect of GABAergic inhibition on odorant concentration cod-  
587 ing in mushroom body intrinsic neurons of the honeybee. *J. Comp. Physiol. A* **200**, 183–195. doi:  
588 10.1007/s00359-013-0877-8
- 589 [60] Assisi C, Stopfer M, Laurent G, Bazhenov M, 2007 Adaptive regulation of sparseness by feedforward inhibition.  
590 *Nat. Neurosci.* **10**, 1176–84. doi:10.1038/nn1947
- 591 [61] Luo SX, Axel R, Abbott LF, 2010 Generating sparse and selective third-order responses in the olfactory system  
592 of the fly. *PNAS* **107**, 10713–8. doi:10.1073/pnas.1005635107
- 593 [62] Kee T, Sanda P, Gupta N, Stopfer M, Bazhenov M, 2015 Feed-Forward versus Feedback Inhibition in a Basic  
594 Olfactory Circuit. *PLoS Comput. Biol.* **11**, e1004531. doi:10.1371/journal.pcbi.1004531
- 595 [63] Takahashi N, Katoh K, Watanabe H, Nakayama Y, Iwasaki M, 2017 Complete identification of four giant  
596 interneurons supplying mushroom body calyces in the cockroach *Periplaneta americana*. *J. Comp. Neurol.*  
597 **525**, 204–230. doi:10.1002/cne.24108
- 598 [64] Liu X, Davis RL, 2009 The GABAergic anterior paired lateral neuron suppresses and is suppressed by olfactory  
599 learning. *Nat. Neurosci.* **12**, 53–59. doi:10.1038/nn.2235
- 600 [65] Grünewald B, 1999 Morphology of feedback neurons in the mushroom body of the honeybee, *Apis mellifera*.  
601 *J. Comp. Neurol.* **404**, 114–126
- 602 [66] Barlow H, 1961 Possible principles underlying the transformations of sensory messages. In *Sens. Commun.*,  
603 vol. 6, 57–58. doi:10.7551/mitpress/9780262518420.003.0013
- 604 [67] Barlow H, 2001 Redundancy reduction revisited. *Netw. Comput. Neural Syst.* **12**, 241–253. doi:  
605 10.1080/net.12.3.241.253
- 606 [68] Uchida N, Poo C, Haddad R, 2013 Coding and Transformations in the Olfactory System. *Annu. Rev. Neurosci.*  
607 **36**, 363–385. doi:10.1146/annurev-neuro-071013-013941
- 608 [69] Friedrich RW, Wiechert MT, 2014 Neuronal circuits and computations: pattern decorrelation in the olfactory  
609 bulb. *FEBS Lett.* doi:10.1016/j.febslet.2014.05.055
- 610 [70] Galizia CG, 2014 Olfactory coding in the insect brain: data and conjectures. *Eur. J. Neurosci.* **1–12**. doi:  
611 10.1111/ejn.12558
- 612 [71] Bhandawat V, Olsen SR, Gouwens NW, Schlieff ML, Wilson RI, 2007 Sensory processing in the *Drosophila*  
613 antennal lobe increases reliability and separability of ensemble odor representations. *Nat. Neurosci.* **10**,  
614 1474–82. doi:10.1038/nn1976
- 615 [72] Olsen SR, Bhandawat V, Wilson RI, 2010 Divisive normalization in olfactory population codes. *Neuron* **66**,  
616 287–299. doi:10.1016/j.neuron.2010.04.009
- 617 [73] Mazor O, Laurent G, 2005 Transient dynamics versus fixed points in odor representations by locust antennal  
618 lobe projection neurons. *Neuron* **48**, 661–73. doi:10.1016/j.neuron.2005.09.032
- 619 [74] Buonomano DV, Maass W, 2009 State-dependent computations: spatiotemporal processing in cortical net-  
620 works. *Nat. Rev. Neurosci.* **10**, 113–125. doi:10.1038/nrn2558
- 621 [75] Goodman DFM, Brette R, 2009 The Brian Simulator. *Front. Neurosci.* **3**, 192–197. doi:  
622 10.3389/neuro.01.026.2009
- 623 [76] Treves A, 1993 Mean-field analysis of neuronal spike dynamics. *Network: Comput. Neural Syst.* **4**, 259.  
624 doi:10.1088/0954-898X/4/3/002
- 625 [77] Willmore B, Tolhurst DJ, 2001 Characterizing the sparseness of neural codes. *Network* **12**, 255–270. doi:  
626 10.1088/0954-898X/12/3/302
- 627 [78] Rish I, 2001 An empirical study of the naive Bayes classifier. In *Work. Empir. methods Artif. Intell.*, vol.  
628 **22230**, 41–46
- 629 [79] Pedregosa F, et al., 2012 Scikit-learn: Machine Learning in Python. *J. Mach. Learn. Res.* **12**, 2825–2830.  
630 doi:10.1007/s13398-014-0173-7.2
